# Supplementary material for: Wip1 inhibitor CCT007093 alleviates immune exhaustion of lymphocytes via p65 NF-κB and YY1 in chronic hepatitis B virus infection in mice
Source: Front Immunol. 2025 May 9;16:1548814. doi: 10.3389/fimmu.2025.1548814 (PMC12098592; doi:10.3389/fimmu.2025.1548814)
Supplement: Supplementary Table 2 — Transcription factor targets showing enrichment in response to CCT007093 treatment in Jurkat or BJAB cells. The list of transcription factor targets was sourced from MSigDB’s c7-tft category, and the enrichment analysis was conducted using GSEA. [file Table2.xlsx]

## Sheet: CCT25 vs DMSO
Supplementary Table 2. Transcription factor targets showing enrichment in response to CCT007093 treatment in Jurkat or BJAB cells. The list of transcription factor targets was sourced from MSigDB's c7-tft category, and the enrichment analysis was conducted using GSEA.
Cell	ID	Enrichment Score (ES)	Normalized ES	p-value	q-value	Core enrichment
BJAB	HMCES_TARGET_GENES	-0.99843	-1.69814	3.2138e-07	0.00158711	MT-ND4L/MT-ND3/MT-ND6/MT-CYB/MT-ND4/MT-CO1
BJAB	SNAI1_TARGET_GENES	-0.879546	-1.72718	0.000281568	0.0993215	RABGGTB/ODC1/MT-ND4L/MT-ND5/MT-ND6/MT-ND1/MT-CYB/MT-ND4/MT-CO3/MT-CO1/MT-ATP6
BJAB	SRF_C	0.852553	1.7206	0.000512645	0.105486	ACTB/CCN1/PFN1/COL1A2/THBS1/FLNA/JUNB/ANXA6/CFL1/CNN2/EGR1/IER2/MYL6/DSTN/ACTN1/YWHAZ/RGS3/FOS
BJAB	RAAGNYNNCTTY_UNKNOWN	0.887107	1.7441	0.000591174	0.107314	ACTB/NNMT/ZFP36L1/PTMA/ID3/TUBA1A/SFRP2/ATF4/YWHAQ
BJAB	NPM1_TARGET_GENES	0.777472	1.64322	0.00142437	0.169624	ACTB/ACTG1/EEF2/S100A6/RPL12/RPS8/RPL7A/RPS7/TUFM/PPIA/YBX1/RPL27A/RPS19/RPL18/CDC25B/GOT2/EIF3G/H3-3B/EIF5A/ILK/AURKAIP1/CTDSP2/SNRPE/RPL37A/COASY/UBXN6/ATXN2L/HNRNPUL1/SSRP1/NAA38/TLN1/RPS20/RPL10A/SUMO1/COX4I1/CNP/HDLBP
BJAB	SRF_Q5_01	0.832789	1.69441	0.00170722	0.186865	ACTB/COL1A1/PFN1/THBS1/FLNA/JUNB/ANXA6/CFL1/CNN2/EGR1/IER2/MYL6/DSTN/CDC25B/VASP/MYADM/SGK1/ACTN1/CDKN1B/EEF1B2/FOS/ATF4/UBE2H/CXCL5/CITED2/TPM2/H3-3A
BJAB	ZNF589_TARGET_GENES	0.724699	1.5548	0.00178176	0.186865	ACTB/ACTG1/OAZ1/BSG/SOD2/H2BC12/CFL1/RHOA/ANPEP/LASP1/MYL6/FASN/H1-2/LDLR/PRKCSH/DNAJB1/MAZ/MDH1/KHSRP/ATP5F1A/H3-3B/SND1/CCDC124/SH3GL1/SUMO2/FADS1/LYPLA1/ESD/ECH1/ERP29/TBC1D17/BOD1/PTBP1/AP2S1/AKT1S1/AKR1A1/TRIP6/CALM3/HIF1A/NOP53/EHBP1L1
BJAB	PBXIP1_TARGET_GENES	0.824012	1.64547	0.00292087	0.227157	ACTB/FTH1/THBS1/FDFT1/FADS2/B2M/CALR/PABPC1/NDUFB10/SLC25A23
BJAB	OCT1_B	0.812597	1.64628	0.00490253	0.262892	MMP1/CCN1/H2BC12/ID3/SH3BGRL/SFRP2/TWIST1/H3-3B/H2AC6/SREBF2/JUND/PLPPR2/PRRC2A/PIM2/TCEAL1/PRRX1/RRAS
BJAB	NFY_01	0.784117	1.61235	0.0048686	0.262892	ACTB/COL1A1/CNN3/JUNB/CKS2/DSTN/TXNIP/SIX1/MAZ/FDPS/H3-3B/CAT/PLK1/WBP2/RGS3/FADS1/SREBF2/PNRC1/TACC3/HIF1A/HSPA1A/TAF15/MLEC/PPP1R7
BJAB	GGGNNTTTCC_NFKB_Q6_01	0.855137	1.65762	0.00583705	0.273718	MT2A/PFN1/TUBA1A/LASP1/NFKBIA/BCL3/MSC/MYADM/TP53/UBE2H/NFKB2/BIRC3/UBE2M/TCEA2
BJAB	AAANWWTGC_UNKNOWN	0.820111	1.6372	0.0073412	0.294849	ACTB/LOX/DSTN/SFRP2/BCL6/CITED2/MAPK3
BJAB	GABP_B	0.744266	1.55317	0.00746679	0.294849	ACTB/CCDC85B/GNB2/RHOA/MAGED2/PCBP1/EIF5A/DPM1/ELK3/COX6A1/SSR4/SF3A1/UBXN1/CAP1/SHKBP1/ASPHD1/MLEC/SCAMP3/U2AF2/RAB11B/WDR1/SPG21/DDIT3/USB1/LSM5/GTF2A2/GALNT10/PHB2/RNPS1/IDH3G/PSMB1/PER1/AP1M1/EPN1/MTPN/MRPL3
BJAB	DROSHA_TARGET_GENES	-0.960756	-1.82399	0.0082469	0.298628	ARHGAP22/MT-ND3/MT-ND1/MT-ND2/MT-CO3/MT-ATP6
BJAB	SRF_Q6	0.783845	1.60179	0.00831468	0.298628	ACTB/COL1A1/PFN1/COL1A2/THBS1/FLNA/JUNB/ANXA6/CFL1/CNN2/EGR1/MYL6/MYADM/ACTN1/CDKN1B/FOS/ATF4
BJAB	THRA_TARGET_GENES	-0.950878	-1.82298	0.00943932	0.301679	PNISR/EIF3E/MT-ND6/MT-ND2/MT-CYB/MT-CO1/MT-CO2
BJAB	AP4_Q6_01	0.795059	1.61506	0.00906229	0.301679	ACTB/TUBB4A/CREB3L1/YWHAZ/ERF/CDKN1B/SUMO2/LGALS1
BJAB	HNF4_01_B	0.764067	1.57039	0.00954454	0.301679	ACTB/HDGF/PRKCSH/PRKACA/TP53/EFEMP1/DCTN2/PTMS/PEPD/SREBF2/EIF4G1/CALM3/PAK4/MLEC/ARCN1/RNF5/ACOT7/TGIF1/MRPS28/ILRUN/SELENOM/ASXL1/MAP3K11/TRIM47/RHOB/ACOT8/BAZ2A/AP1B1/RCN2/GALNT2/CDK16
BJAB	GTF2A2_TARGET_GENES	0.700518	1.47727	0.010729	0.312585	ACTB/ACTG1/TMSB4X/FTL/EEF2/CCN1/IER3/RPL36/VIM/RPL12/RPL3/RPL8/HERPUD1/OAZ1/RPS8/JUNB/H2AZ1/RPS12/PRDX1/RPS7/EGR1/RPLP1/SAT1/RPS3/PPIA/H1-10/FASN/ZFP36/CALR/RPLP0/RPS18/RPS2/RPL18/RPS9/DNAJB1/RPL22L1/SGK1/PRMT1/PABPC1/TUBB4B/H3-3B/CCNI/RPL29/TUBA1B/H2AC6/EEF1D/SQSTM1/UQCRC2/RPS27/SEC13/FOS/ATF4/RPL13/RPL37A
BJAB	IGLV5_37_TARGET_GENES	0.71373	1.5068	0.01128	0.314497	ACTG1/NNMT/TFPI2/GNB2/RPS7/CTNNA1/NFKBIA/MYOF/PRKCSH/LMNA/ETS1/GSN/STAT1/SSBP4/SEC13/PNRC1/MBOAT7/ATXN2L/SLC2A4RG/TNS3/UBL4A/AHCY/C1RL/PDHX/SUCLG1
BJAB	NR0B1_TARGET_GENES	0.747739	1.53759	0.014146	0.326901	ACTB/NAMPT/GNB2/IER2/BCL3/GDF15/OPN3
BJAB	METHYLCYTOSINE_DIOXYGENASE_TET_UNIPROT_A0A023HHK9_UNREVIEWED_TARGET_GENES	-0.931095	-1.75197	0.0158582	0.339023	PUM3/DNAJC9/MT-ND1/MT-ND2/MT-CYB/MT-CO1
BJAB	PR_Q2	0.769363	1.57055	0.0158261	0.339023	MT2A/LOX/H2AZ1/CCN2/SCD/HMGCS1/RAB1B/PRDX6/SND1/CDKN1B/RGS3/MRPL14
BJAB	IK3_01	0.771607	1.56158	0.0157541	0.339023	MMP1/CCN1/NNMT/EGR1/NFKBIA/ACTN1/FOS/CXCL5/TFAP2A/AAMDC/PRRX1/RAB11B/SLC50A1
BJAB	WDHD1_TARGET_GENES	-0.903522	-1.73775	0.0175842	0.356476	EXOSC8/NSFL1C/NOP16/RPL37/MT-ND4L/MT-ND3/MT-ND6/MT-CYB/MT-ND4
BJAB	RBM15_TARGET_GENES	0.830474	1.61882	0.017649	0.356476	ACTB/ACTG1/ANXA5/VIM/RPL3/H2BC12/RPS15/RPS2/GIPC1/H3-3B/SUMO2/FOS
BJAB	MTF1_Q4	0.777565	1.59619	0.0176478	0.356476	MT2A/ACTN4/CAVIN1/H1-0/EHD2/EGR1/HMGA1/MAGED2/MARCKS/COL12A1/KHSRP/CLIP3/EIF5A/GNAI2/ELK3/HMG20B
BJAB	SRF_Q4	0.76286	1.55727	0.0187863	0.369476	ACTB/PFN1/THBS1/FLNA/JUNB/ANXA6/CCN2/CFL1/EGR1/IER2/MYL6/DSTN/VASP/SGK1/ACTN1/SND1/CDKN1B/EEF1B2/FOS/SERPINH1/CITED2
BJAB	PSMB5_TARGET_GENES	0.741149	1.53385	0.0212265	0.390672	ACTB/FTH1/ACTG1/TMSB4X/FTL/EEF2/CCN1/COL1A1/IER3/S100A6/RPL12/RPL3/THBS1/SLC38A2/PKM/FLNA/JUNB/PTMA/H2AZ1/DDIT4/RPS12/PRDX1/CCN2/H2BC12/CFL1/RPS28/TUBA1A/CKS2/RPLP1/MYL6/ZFP36/CALR/FAU/RPLP0/H1-2/RPS2/CDC25B/RPS9/LMNA/SGK1/PABPC1/TWIST1/PLK2/TUBB4B/H3-3B/TUBA1B/H2AC6/RPS27/LGALS1/ATF4
BJAB	TCCATTKW_UNKNOWN	0.745633	1.52579	0.0227266	0.407381	FTH1/CCDC85B/GNB2/MYL6/LMO4/MARCKS/IGFBP4
BJAB	OLF1_01	0.726323	1.48593	0.0233258	0.412139	MMP1/CCN1/CREB3L1/EGR1/MAGED2/SGK1/PRMT1/H3-3B/RGS3/PTMS/ELK3
BJAB	SRF_01	0.861747	1.5441	0.0246839	0.424737	PFN1/THBS1/FLNA/JUNB/ANXA6/CFL1/CNN2/EGR1/IER2/MYL6/ACTN1/FOS
BJAB	TATA_C	0.737984	1.51589	0.0257803	0.439014	ACTB/EEF2/CCN1/COL1A1/LOX/HERPUD1/CCDC85B/EPAS1/RHOA/TWIST1/H3-3B
BJAB	AP2_Q6	0.732251	1.51108	0.0258588	0.439593	ACTB/H1-0/CREB3L1/BCL3/MYADM/SFRP2/PABPC1/VEGFB/IRF1/TEAD2/TLN1/TMEM256/ACTR1A/CNP/HDLBP/PCIF1/RELB/MTA2/PRR16/GALNT10/ATP5PD/APLP1
BJAB	ZNF197_TARGET_GENES	0.645326	1.38321	0.028035	0.468524	ACTG1/NNMT/OAZ1/BSG/CFL1/STAT3/LASP1/FASN/PRKCSH/COX7C/MDH1/MARS1/H3-3B/CCDC124/SH3GL1/SUMO2/LYPLA1/ECH1/BOD1/RAB29/PTBP1/AP2S1/HIF1A/TMEM14B/NOP53/EHBP1L1/NDRG3/SCAF1/GHITM/IL1R1/TCEA2/TLE5/TFPT/GPKOW/USF2/SCAMP4/PKN1/CYB5R3/PHF13/GNB1/RABAC1/THYN1/DDX23/HTRA2/DNAAF5
BJAB	CDH4_TARGET_GENES	-0.905624	-1.73112	0.0283317	0.472682	RAC1/FKBP1A/PGK1/MT-ND4L/MT-ND3/MT-ND4
BJAB	GTF2E2_TARGET_GENES	0.710667	1.49042	0.0311636	0.502938	FTH1/ACTG1/FTL/RPL36/RPL12/HERPUD1/OAZ1/RPS8/JUNB/PTMA/DDIT4/RPS12/PRDX1/RPS28/EGR1/RPLP1/RPLP0/H1-2/LDLR/TXNIP/RPS9/EIF3G/GDF15/RACK1/TUBB4B/MAF1/TUBA1B
BJAB	CCCNNGGGAR_OLF1_01	0.734369	1.52251	0.0322006	0.515462	MMP1/VAT1/PTMA/H1-0/GNB2/EGR1/LASP1/NFKBIA/MAGED2/VASP/SFRP2/SEPTIN9/H3-3B/ICAM1/RGS3/PTMS/ELK3/ELL2/MAP4/PRRC2A
BJAB	MAPK3_TARGET_GENES	0.852275	1.56654	0.042654	0.591711	ACTB/ACTG1/RPL8/SLC38A2/PKM/SOD2/SAT1/PPIA/B2M/LDLR/DNAJB1
BJAB	AR_01	0.775728	1.53509	0.0460123	0.591711	MT2A/DSTN/TXNIP/SIX1/GOT2/SGK1/NAT14/TMED9/HNRNPD/ELL2/PSME2/BCL6
BJAB	OCT1_01	0.728985	1.47512	0.0486322	0.591711	MMP1/CCN1/ID3/SH3BGRL/LMO4/SFRP2/H3-3B/H2AC6/SREBF2/CITED2/PLPPR2/PRRC2A/PIM2
BJAB	IK2_01	0.719713	1.47409	0.0455927	0.591711	ACTB/GNB2/CCN2/SAT1/MAGED1/BCL3/COL12A1/ETS1/ACTN1/CDKN1B/NRP2/ITM2B/TEAD2/STIP1
BJAB	DLX6_TARGET_GENES	0.634715	1.36229	0.0491803	0.591711	FTH1/HERPUD1/ENO1/RPS8/PTMA/HDGF/RPS12/FADS2/RPL19/RPL27A/RPS18/LDLR/BCL3/VASP/SNRPA/SEC61B/RPL30/PCBP1/RACK1/SEPTIN9/H3-3B/MVB12A/CCDC124/CDKN1B/H2AC6/UQCRC2/HAX1/SHMT2/SHC1/COASY/AARS1/YIPF3/ATXN2L/ATP6V1A/KRT8/HNRNPA2B1/DAZAP2/CITED2/CCNB1/CALM3/PDCD4/SCAF1/PSMB5/RNH1/TFAP2A/GHITM/PSAT1/CDK4/HMGCR/RHOC/STAM/RRAS/SNAP23/ELOB/CMBL/TFPT/RPS27A/SF3B6/HINT1/RBBP4/RPL6/NBR1/PLOD3/SAE1/LTBR/DNAAF5/MR…
Jurkat	FOXJ2_TARGET_GENES	0.798067	1.72822	0.000976529	0.443211	TXNIP/HSP90B1/ZFP36L1/JUND/TUBB4B/SLC38A2/LYPLA2/NDUFA2/PPP1R15A/PIM1/IFRD2/PER1/CSF1/SF3B5/TIPARP/EHD1/GABARAPL1/MVB12A/GNAS/YWHAE/CITED2/TGIF1/HSF1/ISYNA1
Jurkat	THRA_TARGET_GENES	-0.898324	-1.84687	0.0194934	0.454161	MT-ND6/MT-CO1/EIF3E/MT-CYB/MT-ND2/MT-CO2
Jurkat	DROSHA_TARGET_GENES	-0.940271	-1.84215	0.0081983	0.454161	MT-ND1/MT-ND3/MT-ND2/MT-ATP6/MT-ATP8/MT-CO3
Jurkat	AR_01	0.882735	1.82448	0.0203762	0.454161	TXNIP/MT2A/GOT2/PER1/BCL6/TSC22D3/ETV5/TMED9/PDXK/SIPA1/IP6K2/TGIF1/SMOX
Jurkat	MAML1_TARGET_GENES	0.874166	1.81186	0.00591626	0.454161	TXNIP/SAT1/GADD45B/SEC14L1/OST4/CYBA
Jurkat	FREAC3_01	0.867944	1.79808	0.00969434	0.454161	HSP90B1/HERPUD1/SQSTM1/TGFB1/MAFF/TRIM8/RBM39/FSTL1/LAMB3/CPNE1
Jurkat	NFKAPPAB_01	0.867614	1.79454	0.00180886	0.454161	HSP90B1/MSN/PFN1/CCN2/TRAF4/GADD45B/RRAS/PTMS/NFKBIB
Jurkat	FOXO4_02	0.843528	1.76787	0.0112802	0.454161	TXNIP/SQSTM1/RASD1/MARCKSL1/MAFF/POLR2L/TRIM8/EIF4G2/NR1D1/COX7B/EHD1/ETV5
Jurkat	NFKAPPAB65_01	0.851835	1.76558	0.0155279	0.454161	HSP90B1/IER3/PFN1/TRAF4/GADD45B/RRAS/EIF4G1/NFKBIB/RPS19
Jurkat	MZF1_02	-0.820763	-1.75803	0.00734954	0.454161	UQCRH/CBX3/C6orf62/P4HA1/PTMA/H1-0/TPT1/HNRNPA2B1/MMP1
Jurkat	NFKB_Q6	0.840086	1.74662	0.0140088	0.454161	HSP90B1/CCN1/PFN1/CCN2/TGFB1/EPHA2/STIP1/MARCKSL1/NFKBIB/LASP1/PAFAH1B3
Jurkat	NFY_01	0.820507	1.72126	0.0149339	0.454161	TXNIP/ACTB/JUNB/ATP2A2/RAB5IF/PPP2R1A/HIF1A/FDPS/DUSP6
Jurkat	TGCTGAY_UNKNOWN	0.798835	1.71998	0.00496181	0.454161	HSPA5/RPL28/GADD45A/DDIT3/BRD2/TRAF4/ARF1/PKN1/SRRM2/PPP1R15A/AGAP3/CPNE1/TSC22D3/DLC1/ETV5/TPM4/PTOV1/ISCU/LRATD2/METAP1/SND1/GPAA1/SREBF2/HEBP1/PREB
Jurkat	RACCACAR_AML_Q6	0.819656	1.69809	0.0205744	0.454161	HSP90B1/CALR/SDF2L1/TNFRSF12A/BCL6/NDUFA3/NUTF2/CPNE1
Jurkat	SRF_C	0.817893	1.69369	0.0179147	0.454161	CCN1/FOSL1/ACTB/PFN1/JUNB/EGR1/MYL6/FLNA/LCP1/CFL1/CNN2/DUSP6/THBS1/PDLIM5/YRDC/KLF6/FGFRL1/SIPA1/FHL2/PDLIM4
Jurkat	CEBP_Q3	0.804881	1.66479	0.0163334	0.454161	CCN1/CALR/DDIT3/JUNB/BRD2/MAP2K3/JUN/BCL6/CLTC/ETV5/PCGF1
Jurkat	MAPK3_TARGET_GENES	0.880845	1.65335	0.024294	0.454161	HSPA8/SAT1/ACTG1/EEF1A1/ACTB/LDLR/RPL8/RPL13A/SLC38A2/DNAJB1/SAMD1/MIDN
Jurkat	CETS1P54_01	-0.742621	-1.60357	0.0228422	0.454161	UFC1/CSF3/SRSF6/EBNA1BP2/INSIG2/COX17/IL7R/NKAPD1/FBXO28/PSMD12/NRDC/LZIC/CAP1/ZNF22/ARF3/UQCRH/ACTR2/HNRNPD/NASP/RPL26/RPLP2/RPL6/RPS18/MMP1
Jurkat	SNAI1_TARGET_GENES	-0.720845	-1.58572	0.0254018	0.454717	TMEM165/SKA3/SEMA4B/RPS6/HSD17B11/CIRBP/MT-ND1/SET/NASP/MT-ND6/MT-CO1/SSBP1/RPS20/EIF3E/RPL5/MT-ND4L/MT-CYB/MT-ATP6/MT-ATP8/MT-CO3
Jurkat	BCL6B_TARGET_GENES	0.817689	1.68666	0.0266667	0.455286	HSP90B1/PFN1/LDLR/BCL6/TMBIM6/PPP2R2A/AP2B1
Jurkat	NFY_Q6_01	0.808375	1.69705	0.0278522	0.455582	TXNIP/HERPUD1/FDFT1/PIM3/ATP2A2/RAB5IF/HIF1A/AGAP3/SPRY2/RHOA/ETV5/KATNB1/RNF5/UBALD2/RPA2/PNN/VCP/SREBF2/SEL1L
Jurkat	SRF_01	0.888113	1.65407	0.0275517	0.455582	FOSL1/PFN1/JUNB/EGR1/MYL6/FLNA/CFL1/CNN2/THBS1
Jurkat	AML_Q6	0.836798	1.73356	0.0298504	0.463341	HSP90B1/CCN1/CALR/DUSP1/SDF2L1/ATP2A2/EREG/PER1/BCL6/CPNE1/TSC22D3
Jurkat	NFKB_C	0.809138	1.68866	0.0307776	0.46359	HSP90B1/PFN1/CCN2/AKR1B1/GADD45B/BCL2L1/LYPLA2/PTMS/RHOA/NFKBIB/LAMB3/LASP1
Jurkat	AREB6_03	0.795775	1.65644	0.0314362	0.464569	HSP90B1/VAT1/MARCKSL1/SERF2/EHD1/MID1IP1/APP/REPIN1/SSBP4/SMTN/MACROH2A1/PDGFA
Jurkat	GR_Q6	0.81785	1.69558	0.0339844	0.469903	TXNIP/SLC38A2/GOT2/MARCKSL1/PTMS/AGAP3
Jurkat	SMCHD1_TARGET_GENES	-0.881826	-1.64361	0.0346235	0.469903	AUNIP/LRIF1/RPL7L1/SPOCK1/MT-ND6/MT-CYB
Jurkat	NCOA2_TARGET_GENES	0.729863	1.56849	0.0365353	0.478411	TXNIP/MT2A/EEF1A1/MTCH1/DRAP1/C11orf68/TMSB10/ILF2/RND3/LCP1/LASP1/UPF1/TIPARP/GPX3/LGALS3BP/PRMT5/VDAC2/MTFR1/E2F4/UBALD2
Jurkat	NFKB_Q6_01	0.824455	1.71389	0.0424539	0.488114	HSP90B1/PFN1/TRAF4/GADD45B/PTMS/DUSP6/NFKBIB
Jurkat	OSF2_Q6	0.804931	1.67864	0.0415967	0.488114	HSP90B1/SDF2L1/TRAF4/MMP14/PEA15/ATP2A2
Jurkat	MAZR_01	-0.777038	-1.66168	0.0394951	0.488114	PHF23/ITGA6/CDC27/HNRNPDL/H1-0/LGALS1/MMP1
Jurkat	GGGNNTTTCC_NFKB_Q6_01	0.81768	1.65978	0.0442478	0.488114	MT2A/PFN1/UBE2M/PKN1/LASP1/EHD1/ZFAND3/UBE2H/IER5/NFKB2/GEM
Jurkat	HFH3_01	0.798265	1.6522	0.0452899	0.488114	CCN1/DUSP1/CCDC85B/ATP2A2/CRIM1/CPNE1/CSNK1E/ETV5/CNBP
Jurkat	TEL2_Q6	0.783431	1.64629	0.0458637	0.488114	HSP90B1/DDIT3/HMGA1/CCDC85B/JUNB/HBEGF/CKS1B/RNPS1/LYPLA2/LCP1/LPCAT4/SNRPB/NR1D1/TRAPPC1/RIPOR1/SEC24C/PLCG1/ISCU/SIPA1
Jurkat	ZNF331_TARGET_GENES	0.751699	1.59913	0.0458554	0.488114	TXNIP/TUBA1B/GADD45B/C4orf48/STIP1/AURKAIP1/RPL37/CLTC/RPL15/PTPA/AKR1A1/PDXK
Jurkat	CATTGTYY_SOX9_B1	-0.726191	-1.58436	0.0408135	0.488114	HMGN1/SLC39A8/FEN1/SDCCAG8/PICALM/PSIP1/AP5M1/DBF4/RRM2/CSF3/GNG11/YWHAQ/SERINC3/FBXO28/HMGB1/ZNF664/YWHAZ/CDC27/HMGN3/ETS1/NASP/ERH/PTMA/STMN1/MMP1
Jurkat	GTF2E2_TARGET_GENES	0.733394	1.56365	0.048951	0.488114	TXNIP/HERPUD1/DUSP1/ACTG1/EEF1A1/UBE2S/DDIT3/TUBA1B/JUNB/LDLR/TUBA1C/HSP90AB1/RPL41/BRD2/EGR1/FTH1/TUBB4B/GADD45B/RPL38/MARCKSL1/PPP1R15A/TFRC/SNRPB/SLC3A2/H2AX/CPNE1/RPL37/RPLP0/KLF6/RPS28/AKR1A1/PARP2/PRDX1/CITED2/FTL/SRSF2/C12orf73
Jurkat	ZNF16_TARGET_GENES	0.828623	1.55583	0.0486891	0.488114	MT2A/TPM4/SYMPK/TLE5/HMG20B/HOMER3/MRPL34
Jurkat	ZNF589_TARGET_GENES	0.685514	1.50078	0.0472855	0.488114	HSP90B1/ACTG1/ACTB/LDLR/BRD2/MYL6/RAB5IF/PKN1/HIF1A/SRRM2/RPL24/PPP1R15A/ARF4/CFL1/DNAJB1/FASN/IFRD2/RHOA/TMBIM6/SH3GL1/LASP1/MAZ/LSM10/EHD1/GNB1/CAPG/AKR1A1/USP36/DPP9/SEC24C/UBALD2/RPL31/SND1/XPO6/FHL2/PANK4/PPP6R1/TYK2/VOPP1/ADAM15/BABAM1
